# Supplementary material for: Comparing traditional vs environmental DNA monitoring protocols. The case of the Eurasian otter (Lutra lutra) re-expansion in Central Italy
Source: Research Square preprint supplement (doi:10.21203/rs.3.rs-7595038/v1), 2025-10-20
Supplement: Supplementary file 1 [file 1ab34c2f90ca93bf12bad895.docx]

Online Resources

Comparing traditional vs environmental DNA monitoring protocols.

The case of the Eurasian otter (*Lutra lutra*) re-expansion in Central Italy

European Journal of Wildlife Research

Giovacchini Simone, Mirone Enrico, Jamwal Pushpinder Singh, Monaco Pamela, Ramazzotti Fausto, Pioltelli Emiliano, Galimberti Andrea, Bruno Antonia, Canu Antonio, Galaverni Marco, Di Febbraro Mirko, Loy Anna

Corresponding author: Simone Giovacchini, University of Molise, [s.giovacchini@studenti.unimol.it](mailto:s.giovacchini@studenti.unimol.it)

Online Resource 1. Layers, reclassification and source used to produce an expert-based habitat suitability model along the rivers of the Latium region.

| Layer | Reclassification | Source |
| --- | --- | --- |
| Altitude | > 2000 m.a.s.l. = 0  1500 – 2000 m.a.s.l.= 1  1000 – 1500 m.a.s.l. = 2  500 – 1000 m.a.s.l. = 3  0 – 500 m.a.s.l. = 4 | Tarquini et al. 2023 |
| Slope | >70° = 3 | Tarquini et al. 2023 |
| Land cover: artificial surfaces | Urban and industrial fabric = 0 | De Fioravante et al. 2022 |
| Land cover: agricultural areas | Arable lands = 1  Pastures = 1  Fruit trees = 1  Olive groves = 1  Vineyards = 1  Agro-forestry areas = 1 | De Fioravante et al. 2022 |
| Land cover: forest areas | Coniferous forest = 2  Broad-leaved forest = 3 | De Fioravante et al. 2022 |
| Land cover: semi-natural areas | Natural grasslands = 1  Shrubs = 3 | De Fioravante et al. 2022 |
| Land cover: open spaces | Beaches, dunes, sands = 1  Bare rocks and cliffs = 3  Glaciers and perpetual snow = 0 | De Fioravante et al. 2022 |
| Land cover: wetlands | Wetlands = 3 | De Fioravante et al. 2022 |
| Land cover: water bodies | Permanent water bodies = 3 | De Fioravante et al. 2022 |

Online Resource 2. Expert-based habitat suitability model results distinguished per suitability classes and relative amount of surface.

| Suitability class | Sq-km |
| --- | --- |
| unsuitable | 497,36 |
| low | 268,65 |
| medium | 7,93 |
| high | 183,83 |

Online Resource 3. Cost and time estimate of this eDNA case study conducted in Central Italy across 17 survey sites and 2 validation sites.

|  |  | samples per day | days | cost | km | subtotal |
| --- | --- | --- | --- | --- | --- | --- |
| personnel | assay design and in silico validation | 0,33 | 1 | 80 | - | 1200 |
| in situ validation and survey sampling | 4 | 6 | 480 | - |
| eDNA filtration | 3 | 5 | 400 | - |
| DNA extraction  (survey and validation) | 8 | 2 | 160 | - |
| DNA amplification  (survey and in vitro and in situ validation) | 2 | 1 | 80 | - |
| materials | disposable materials (per sample) | Blood and Tissue extraction kit (validation) | - | 4 | - | 301 |
| filters (x2) | - | 3 | - |
| bottles (x3) | - | 4,2 | - |
| Power Soil extraction kit | - | 7.6 | - |
| qPCR reagents  (amplification) | - | 35 | - |
| qPCR plastics  (amplification) | - | 10 | - |
| Transport | In situ validations (km) | - | - | 25 | 200 | 299 |
| Survey (km) | - | - | 274 | 2,268 |
|  | | | | | | |
